# Supplementary material
Source: publisher site journal article supplement (https://www.dovepress.com/article/358253)
Supplement: Supplementary file 1 [file get_supplementary_file.php]

## Supplementary Appendix

**Supplementary Table 1.** Participating study sites.

|     |                                                                         |
|-----|-------------------------------------------------------------------------|
| 1.  | Beijing An Ding Hospital, Capital Medical                               |
| 2.  | Xinjiang Mental Health Center                                           |
| 3.  | The 3rd People's Hospital of Huzhou City                                |
| 4.  | Beijing Huilongguan Hospital                                            |
| 5.  | Shandong Mental Health Center                                           |
| 6.  | The Affiliated Brain Hospital of Guangzhou Medical University           |
| 7.  | Peking University Sixth Hospital                                        |
| 8.  | The First Hospital of China Medical University                          |
| 9.  | Zhongda Hospital Southeast University                                   |
| 10. | The First Affiliated Hospital of Xi'an Jiaotong University              |
| 11. | Renmin Hospital of Wuhan University                                     |
| 12. | Shanghai Mental Health Centre                                           |
| 13. | Tianjin Anding Hospital                                                 |
| 14. | Hangzhou Seventh People's Hospital                                      |
| 15. | Beijing Tiantan Hospital, Capital Medical University                    |
| 16. | The second Xiangya Hospital of Central South University                 |
| 17. | Nanfang Hospital Southern Medical University                            |
| 18. | The First Affiliated Hospital of Zhejiang University School of Medicine |

**Supplementary Figure 1.** Patient disposition in the RELIEVE China study.

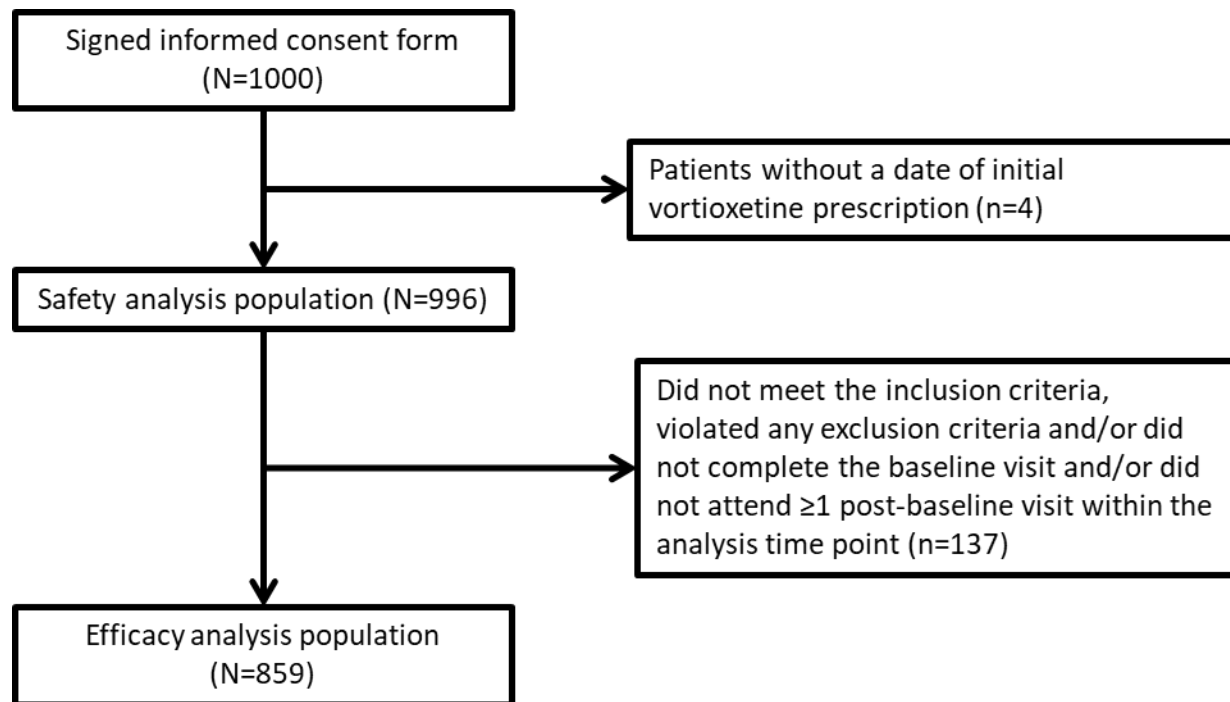

**Supplementary Figure 2.** Observed mean scores from baseline to weeks 8 and 24 for **(A)** SDS–Work/School Dimension, **(B)** SDS–Social Life Dimension, and **(C)** SDS–Family Life/Home Responsibilities Dimension.

**A**

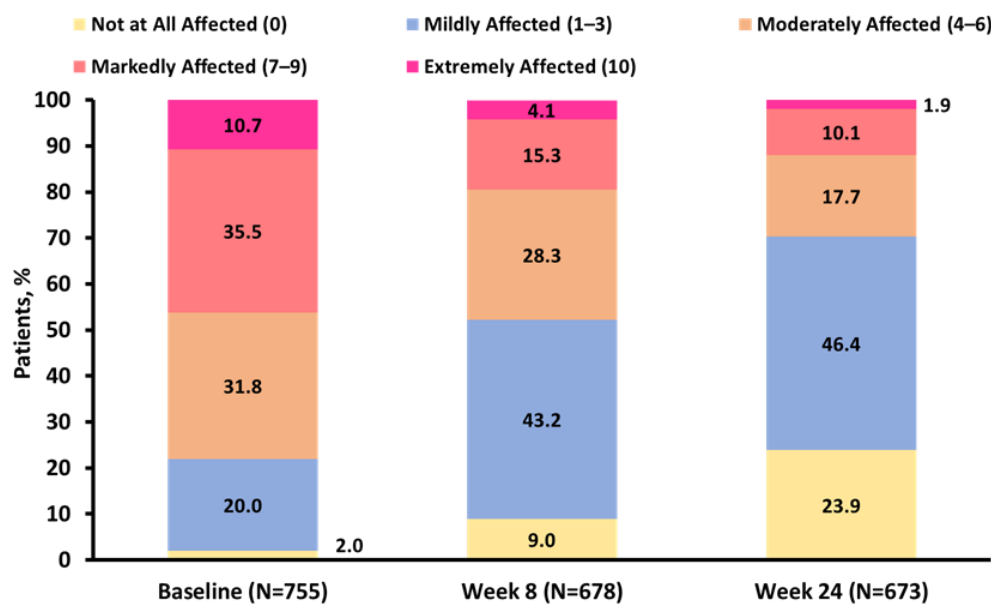

**B**

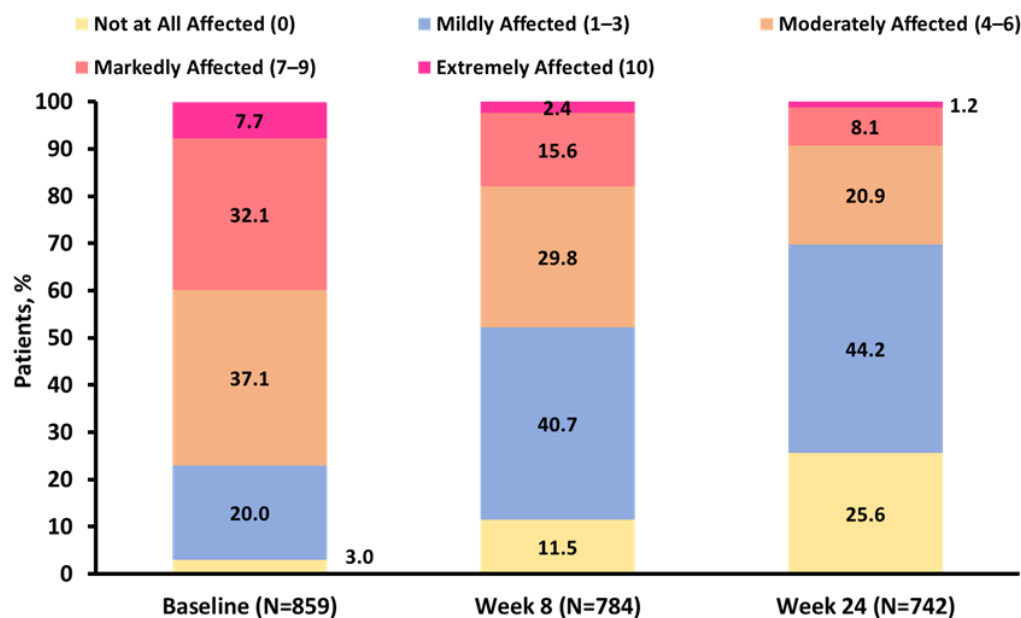

C

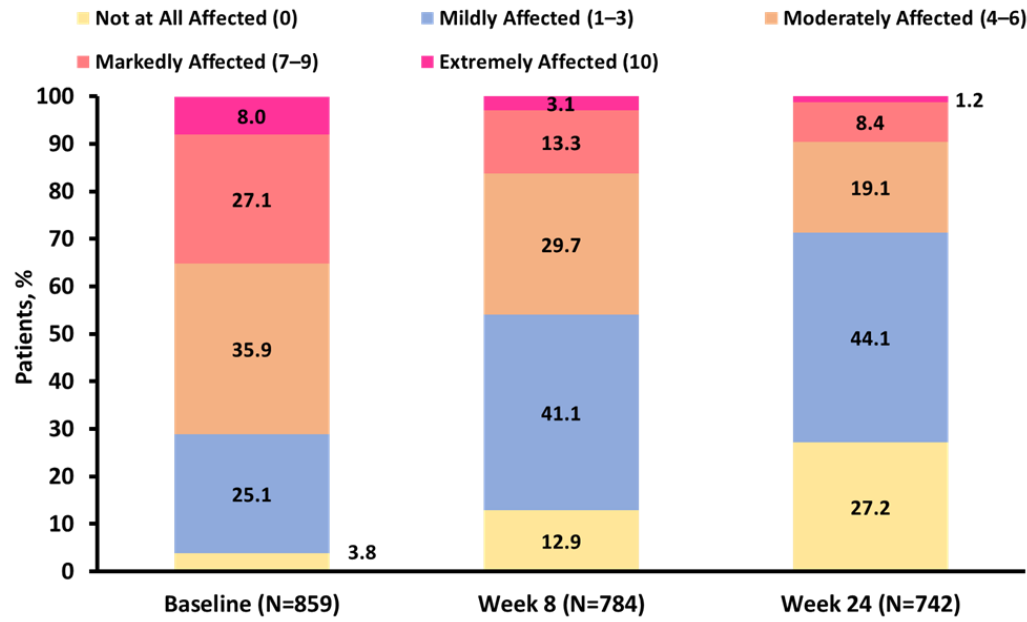

**Abbreviation:** SDS, Sheehan Disability Scale.

**Supplementary Figure 3.** Observed mean scores from baseline to weeks 8 and 24 for (A) PHQ-9, (B) HAM-D17, (C) CGI-S, and (D) mean CGI-I scores at weeks 8 and 24.

**A**

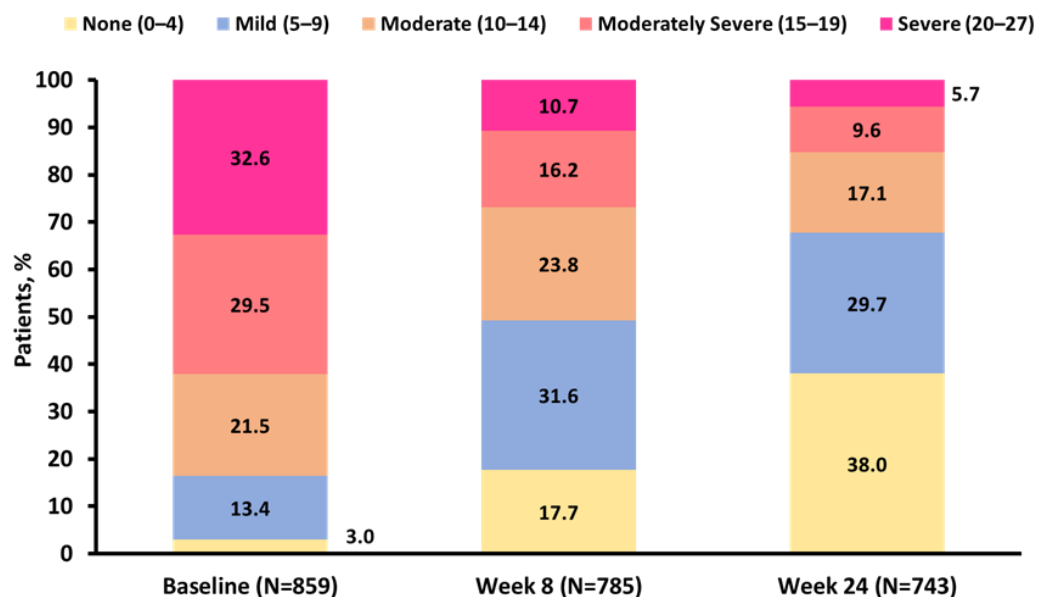

**B**

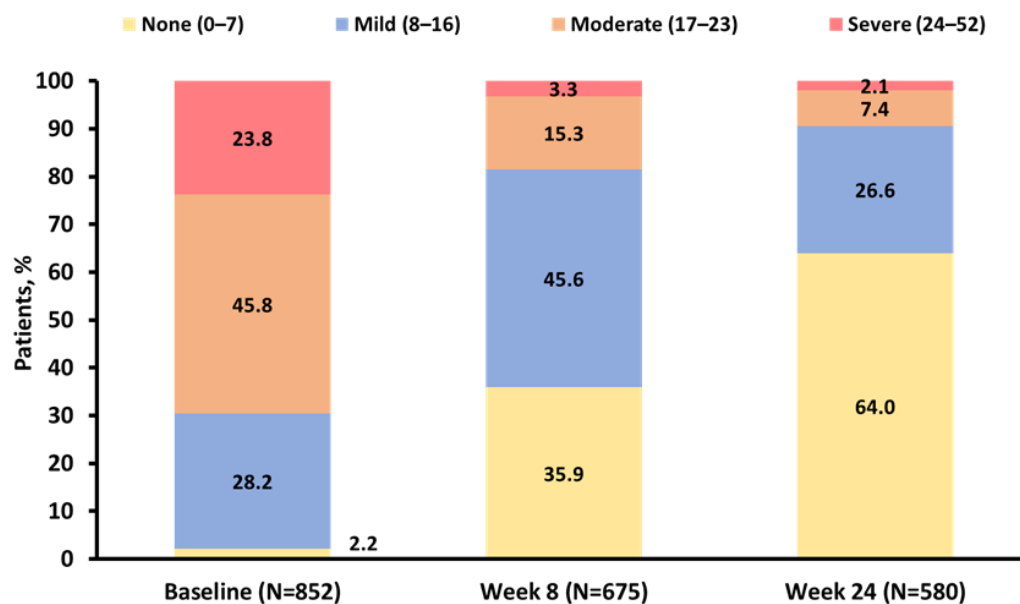

C

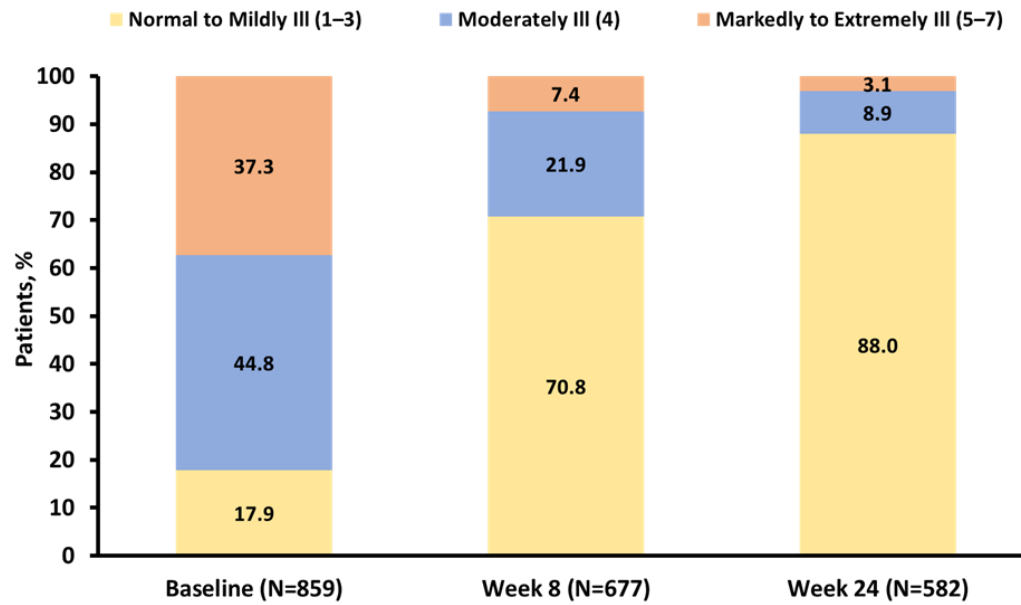

D

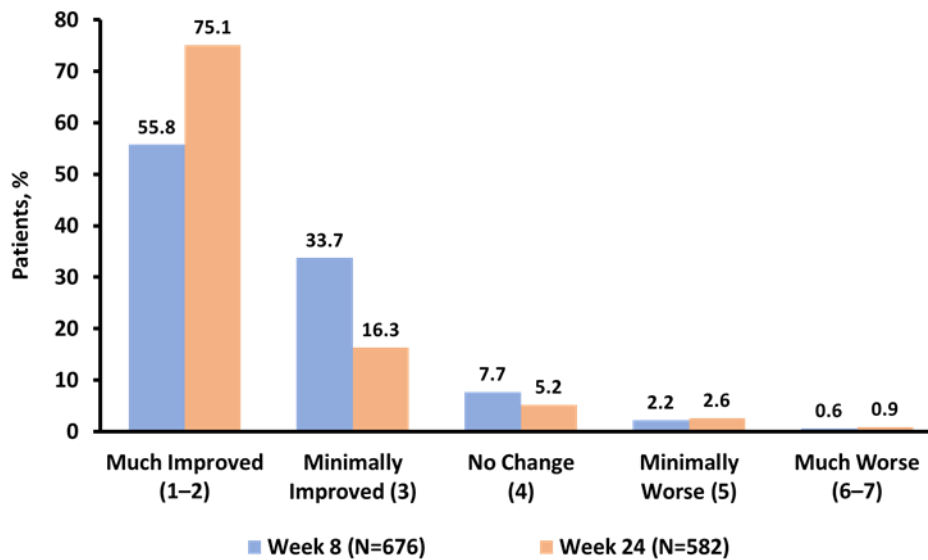

**Abbreviations:** CGI-I, Clinical Global Impressions–Improvement; CGI-S, Clinical Global Impressions–Severity; HAM-D17, Hamilton Depression Rating Scale–17 items; PHQ-9, Patient Health Questionnaire–9 items.

**Supplementary Figure 4.** Observed mean GAD-7 scores from baseline to weeks 8 and 24.

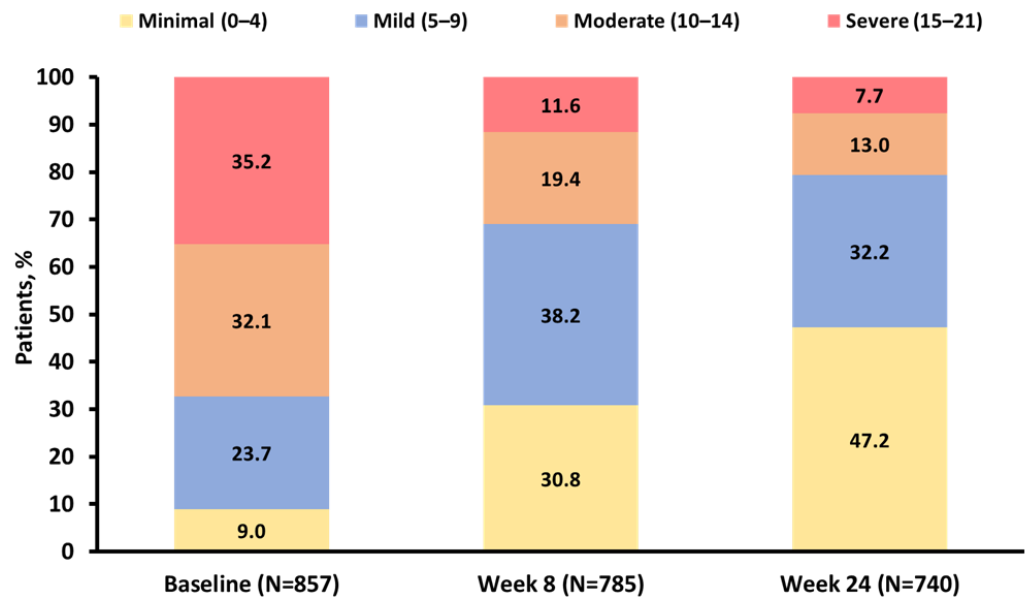

**Abbreviation:** GAD-7, Generalized Anxiety Disorder Scale–7 items.

**Supplementary Figure 5.** Observed PDQ-D mean scores from baseline to weeks 8 and 24.

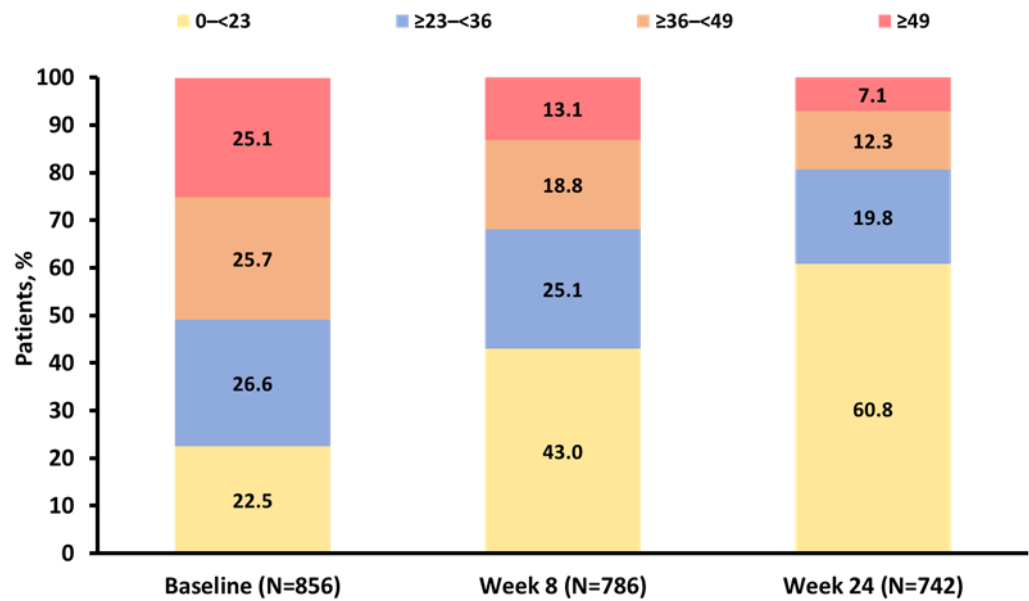

**Abbreviation:** PDQ-D, Perceived Deficits Questionnaire–Depression.
